# Supplementary material
Source: HighWire-hosted journal article supplement (https://www.cmaj.ca/highwire/filestream/148899/field_highwire_adjunct_files/2/221512-res-3-at.pdf)
Supplement: 221512-res-3-at.pdf [file 221512-res-3-at.pdf]

**Supplementary Table 2:** Incidence rate ratio of top cancers in Alberta (stratified by stage) for time trend before SOE, immediate effect of SOE, and the post-SOE monthly recovery rate.

| Cancer     | Stage   | SOE                | Post-SOE          |
|------------|---------|--------------------|-------------------|
|            | 0       | 0.85 (0.67, 1.09)  | 1.00 (0.94, 1.06) |
| Bladder    | I       | 1.02 (0.68, 1.53)  | 1.00 (0.91, 1.10) |
|            | II      | 1.11 (0.60, 2.03)  | 1.04 (0.90, 1.21) |
|            | III     | 0.72 (0.33, 1.55)  | 1.03 (0.85, 1.25) |
|            | IV      | 0.78 (0.36, 1.70)  | 0.89 (0.73, 1.08) |
|            | Unknown | 0.57 (0.31, 1.05)  | 1.13 (0.98, 1.30) |
| Breast     | I       | 0.61 (0.53, 0.72)  | 1.11 (1.07, 1.15) |
|            | II      | 0.79 (0.61, 1.01)  | 1.05 (0.99, 1.12) |
|            | III     | 0.59 (0.40, 0.89)  | 1.14 (1.04, 1.25) |
|            | IV      | 0.83 (0.53, 1.29)  | 1.12 (1.01, 1.23) |
|            | Unknown | 1.07 (0.63, 1.81)  | 0.96 (0.86, 1.08) |
| Cervix     | I       | 1.20 (0.70, 2.07)  | 0.96 (0.85, 1.09) |
|            | II      | 1.55 (0.65, 3.71)  | 0.83 (0.65, 1.05) |
|            | III     | 0.10 (0.01, 0.93)  | 1.48 (0.93, 2.37) |
|            | IV      | 1.68 (0.28, 10.03) | 1.12 (0.72, 1.74) |
|            | Unknown | NA                 | NA                |
| Colorectal | I       | 0.48 (0.34, 0.67)  | 1.12 (1.04, 1.21) |

|          |         |                   |                   |
|----------|---------|-------------------|-------------------|
|          | II      | 0.75 (0.57, 0.99) | 1.08 (1.01, 1.15) |
|          | III     | 0.76 (0.59, 0.97) | 1.05 (0.99, 1.11) |
|          | IV      | 0.84 (0.64, 1.09) | 1.03 (0.96, 1.10) |
|          | Unknown | 0.48 (0.37, 0.63) | 1.14 (1.07, 1.22) |
| Kidney   | I       | 0.97 (0.73, 1.30) | 0.95 (0.88, 1.03) |
|          | II      | 1.29 (0.41, 4.03) | 1.18 (0.90, 1.54) |
|          | III     | 0.86 (0.52, 1.41) | 0.95 (0.84, 1.09) |
|          | IV      | 0.71 (0.38, 1.31) | 1.17 (1.02, 1.35) |
|          | Unknown | 0.91 (0.48, 1.71) | 1.01 (0.87, 1.17) |
| Lung     | I       | 0.83 (0.65, 1.06) | 1.11 (1.05, 1.18) |
|          | II      | 0.84 (0.56, 1.26) | 1.02 (0.92, 1.12) |
|          | III     | 1.00 (0.75, 1.35) | 1.00 (0.93, 1.07) |
|          | IV      | 1.01 (0.86, 1.20) | 0.99 (0.95, 1.03) |
|          | Unknown | 0.71 (0.48, 1.06) | 1.06 (0.97, 1.17) |
| Melanoma | I       | 0.47 (0.34, 0.65) | 1.11 (1.03, 1.19) |
|          | II      | 0.77 (0.46, 1.28) | 0.97 (0.86, 1.10) |
|          | III     | 0.80 (0.44, 1.43) | 1.07 (0.92, 1.24) |
|          | IV      | 0.81 (0.32, 2.00) | 1.01 (0.81, 1.26) |
|          | Unknown | 0.51 (0.37, 0.70) | 1.15 (1.07, 1.24) |
| NHL      | I       | 0.92 (0.56, 1.50) | 0.98 (0.87, 1.10) |

|          |         |                   |                   |
|----------|---------|-------------------|-------------------|
|          | II      | 1.24 (0.75, 2.06) | 0.93 (0.82, 1.05) |
|          | III     | 0.81 (0.52, 1.25) | 0.92 (0.83, 1.03) |
|          | IV      | 1.03 (0.77, 1.39) | 1.00 (0.93, 1.07) |
|          | Unknown | 0.91 (0.56, 1.47) | 0.90 (0.79, 1.02) |
| Prostate | I       | 0.52 (0.37, 0.73) | 1.04 (0.96, 1.13) |
|          | II      | 0.46 (0.36, 0.58) | 1.09 (1.03, 1.15) |
|          | III     | 0.62 (0.48, 0.81) | 1.15 (1.08, 1.22) |
|          | IV      | 0.97 (0.72, 1.30) | 0.99 (0.93, 1.07) |
|          | Unknown | 0.74 (0.62, 0.88) | 1.09 (1.04, 1.13) |
| Uterus   | I       | 0.82 (0.63, 1.05) | 1.05 (0.99, 1.11) |
|          | II      | 0.87 (0.32, 2.33) | 1.05 (0.83, 1.33) |
|          | III     | 1.12 (0.60, 2.10) | 1.00 (0.86, 1.15) |
|          | IV      | 1.18 (0.55, 2.51) | 0.94 (0.78, 1.13) |
|          | Unknown | 0.76 (0.40, 1.44) | 1.11 (0.96, 1.29) |
